# Supplementary material
Source: Elsevier journal article supplement (https://www.sciencedirect.com/science/article/pii/S0300289622003441)

## **Caso clínico**

### **“¿CÓMO ACTUAR ANTE UNA HERIDA POR ARMA DE FUEGO TRANSMEDIASTÍNICA? ROL DEL MANEJO CONSERVADOR Y DE LA CIRUGÍA VATS”**

Autores: C.E. García Franco<sup>1</sup>, F. Altaf <sup>1</sup>, M. Gharbi<sup>2</sup>

<sup>1</sup> Departamento de Cirugía Torácica.

<sup>2</sup> Departamento de Cirugía Cardíaca.

King Abdullah Medical Complex, Jeddah.

Kingdom of Saudi Arabia.

Correspondencia:

Dr. C.E. García Franco.

Departamento de Cirugía Torácica

King Abdullah Medical Complex, Jeddah.

Prince Nayef Street. Northern Abhor. Jeddah 23816.

Kingdom of Saudi Arabia

e-mail: [c.garciafranco@hotmail.com](mailto:c.garciafranco@hotmail.com)

Número de palabras: 500

Presentamos el caso de un varón de 26 años remitido a nuestro servicio de Urgencias tras sufrir herida por arma de fuego en tórax. A la exploración presentaba orificio de entrada en el 4º EIC derecho, línea medio clavicular; sin orificio de salida. Hemodinámica y respiratoriamente estable. El TAC de tórax urgente demostró la presencia de un hemotórax y contusión pulmonar bilaterales (Imagen 1a), así como un orificio derecho de entrada de bala (círculo superior en imagen 1a) y el proyectil alojado a nivel dorsal, debajo del arco posterior de la 7ª costilla izquierda (círculo inferior en imágenes 1a y 1b). No se hallaron lesiones a nivel cardíaco, de grandes vasos ó del área traqueobronquial. Se decidió tratamiento conservador del hemotórax bilateral mediante tubos de tórax.

Al 4º día de ingreso comenzó con fiebre, leucocitosis e imagen de ocupación pleural izquierda (Flecha Imagen 1b). Se procedió a realizar VATS izquierda exploratoria uniportal: encontrando dos desgarros pulmonares en el lóbulo inferior izquierdo, sin fuga aérea ni sangrado activo. Asimismo presentaba un hemotórax retenido, el cual fue evacuado, sin evidenciarse foco hemorrágico intratorácico. No se halló ninguna otra lesión endotorácica relevante. Al finalizar dicha VATS, se procedió a realizar de manera independiente la extracción de la bala (Imagen 1c), la cual se hallaba en el plano subcutáneo dorsal y generaba molestias al paciente.

El postoperatorio cursó sin incidencias y fue dado de alta al 5º día postoperatorio tras buena evolución clínica y radiológica (Imagen 1d). El paciente fue igualmente revisado en consultas externas al mes del traumatismo, confirmándose un postoperatorio tardío sin incidentes.

A raíz de este caso descrito nos gustaría hacer hincapié en determinadas aspectos entorno al manejo de las heridas por arma de fuego transmediastínicas:

1) ¿Se requiere de una exploración diagnóstica sistemática invasiva traqueobronquial, esofágica o vascular en el paciente estable? Existe en la literatura un gran número de autores que abogan por ello <sup>1-3</sup>. Nuestra recomendación es que si existen dudas clínicas, analíticas o radiológicas (tras TAC torácico urgente) que nos hagan pensar en lesiones traqueobronquiales, esofágicas y/o cardiovasculares, realizemos exploraciones diagnósticas específicas de estas áreas. Las lesiones ocultas no diagnosticadas suceden, únicamente, en entorno a un 20% de los pacientes estables <sup>3</sup> ; por tanto, estaríamos sometiendo de forma sistemática, a tratamientos invasivos múltiples e innecesarios, a gran número de pacientes sin lesiones.

2) ¿Cuándo practicaremos un tratamiento conservador?. Creemos que si el paciente se encuentra hemodinámica y respiratoriamente estable, no existe un beneficio evidente en realizar una cirugía urgente de control de daños <sup>1-3</sup>. La observación clínica derivada del seguimiento de las constantes vitales, de los parámetros analíticos (anemia y/o leucocitosis) y del seguimiento radiológico, nos podrán indicar la necesidad de variar esta conducta conservadora.

En nuestro caso fue necesario llevar a cabo la evacuación de un hemotórax retenido tardío, mediante cirugía mínimamente invasiva (VATS uniportal), muy útil en pacientes hemodinámica y respiratoriamente estables: por la posibilidad de explorar de forma poco cruenta toda la cavidad pleural, inspeccionando y reparando, si fuese necesario, estructuras intratorácicas.<sup>2,4,5</sup>

## BIBLIOGRAFÍA

1. Okoye OT, Talving P, Teixeira PG, Chervonski M, Smith JA, Inaba K, Noguchi TT, Demetriades D. Transmediastinal gunshot wounds in a mature trauma center: changing perspectives. *Injury* 2013; 44 (9): 1198-2003.
2. Demetriades D, Velmahos GC. Penetrating injuries of the chest: indications for operation. *Scandinavian Journal of Surgery* 2002; 91: 41-45.
3. Cantu-Sacal A, Trueba Lozano D, Rungs-Brown D, Vazquez-Minero JC. Lesiones transmediastinales. Revisión de la literatura y una visión de lo que se debe hacer. *Neumol Cir Torax* 2015 Abr-Jun; 74 (2): 95-101.
4. Kakamad FH, Ali RK, Mohammed SH, Sofi Mohammed HA, Mustafa MQ, Salih AM, Abdalla BY. Single port video assisted thoracoscopic surgery for removal of a retained bullet in the lung parenchyma. *Ann Med Surg (Lond)*. 30 de octubre de 2021; 71: 102977.
5. Semaan L, Muñoz W, Villafañe D, Garcia Franco CE. Fístula biliotorácica postraumática. *Cir Esp* .2020; 98 (6): 366-7.

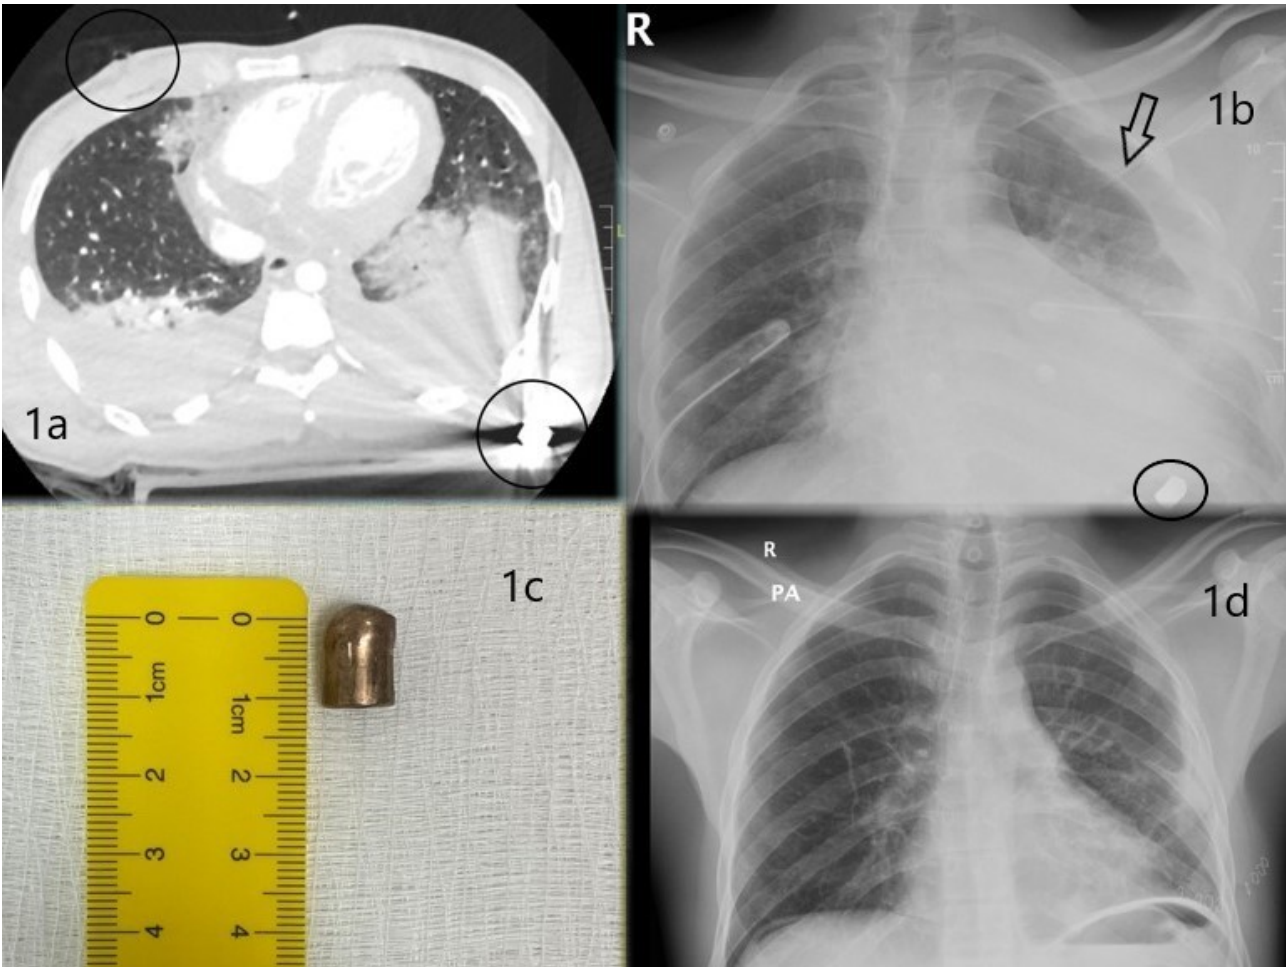

Supplement: mmc1 [file S0300289622003441:mmc1.pdf]
